# Supplementary material for: Structure-performance correlation on bimetallic catalysts for selective CO2 hydrogenation
Source: Royal Society of Chemistry journal article supplement (doi:10.1039/d3ee01650a), 2023-01-01
Supplement: d3ee01650a1.pdf [file d3ee01650a1.pdf]

## Supplementary Information (SI)

### Structure-performance correlation on bimetallic catalysts for selective CO<sub>2</sub> hydrogenation

Sibei Zou <sup>a\*</sup>, Lizhuo Wang <sup>b</sup>, Hao Wang <sup>a</sup>, Xingmo Zhang <sup>b</sup>, Haoyue Sun <sup>b</sup>, Xiaozhou Liao <sup>a</sup>, Jun  
Huang <sup>b\*</sup>, and Assaad R. Masri <sup>a</sup>

<sup>a</sup> School of Aerospace, Mechanical and Mechatronic Engineering, The University of Sydney,  
New South Wales 2006, Australia

<sup>b</sup> School of Chemical and Biomolecular Engineering, The University of Sydney, New South  
Wales 2006, Australia

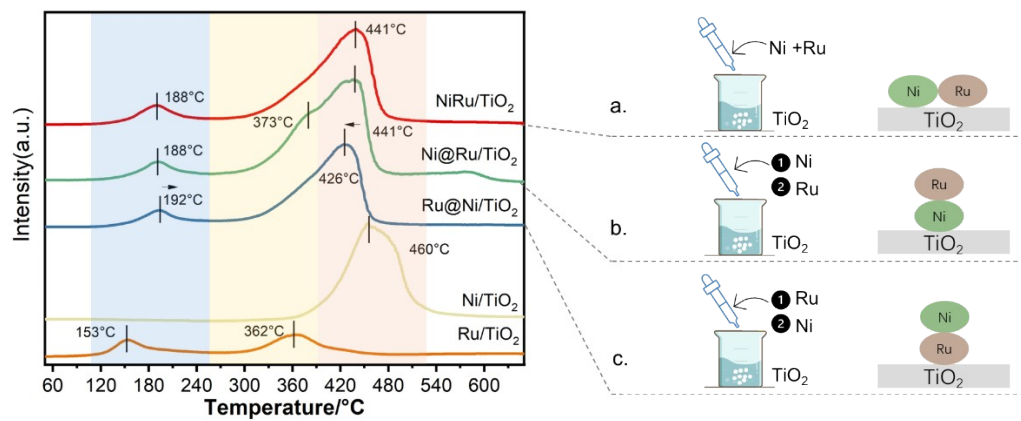

Figure S1. H<sub>2</sub>-TPR experiment over all samples with different impregnation sequences and the relative experiment schematic: (a) NiRu/TiO<sub>2</sub>, (b) Ni@Ru/TiO<sub>2</sub>, (c) Ru@Ni/TiO<sub>2</sub>.

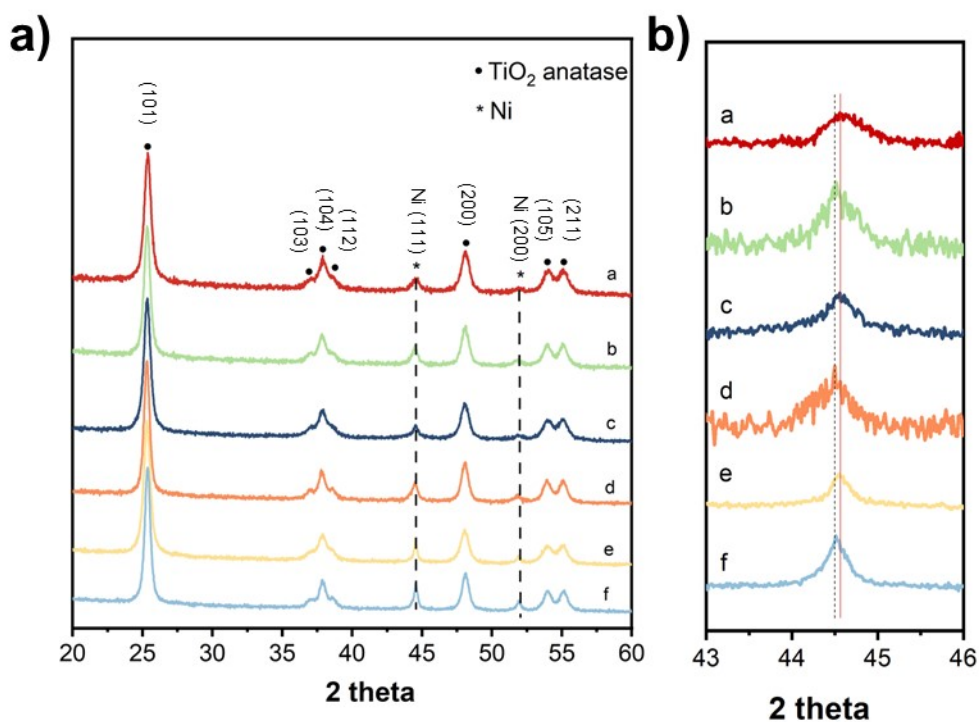

Figure S2. (a) XRD results of all catalysts (a. NiRu/TiO<sub>2</sub>-300, b. NiRu/TiO<sub>2</sub>-500, c. Ni@Ru/TiO<sub>2</sub>-300, d. Ni@Ru/TiO<sub>2</sub>-500, e. Ru@Ni/TiO<sub>2</sub>-300, f. Ru@Ni/TiO<sub>2</sub>-500); (b) magnified region of XRD Ni(111) peak shift

The Ni (111) peaks shift slightly to a lower diffraction angle, possibly due to the formation of a Ni-Ru solid solution formation. Even though they all show the tendency to shifting to lower diffraction angle in samples reduced at 500 °C, these shifts are very small. This is because of the relatively low molar ratio of Ru and Ni (1: 17.2) and the small Ni nanoparticle size at around 1.1 nm. At this stage, there should be slight lattice distortion due to such small amount of Ru dispersed into Ni nanoparticles as alloy formation, which will have very small affection on lattice distance. Therefore, further characterizations such as STEM-HAADF, EDS, EELS, and XPS are necessary to reveal the bimetallic structures.

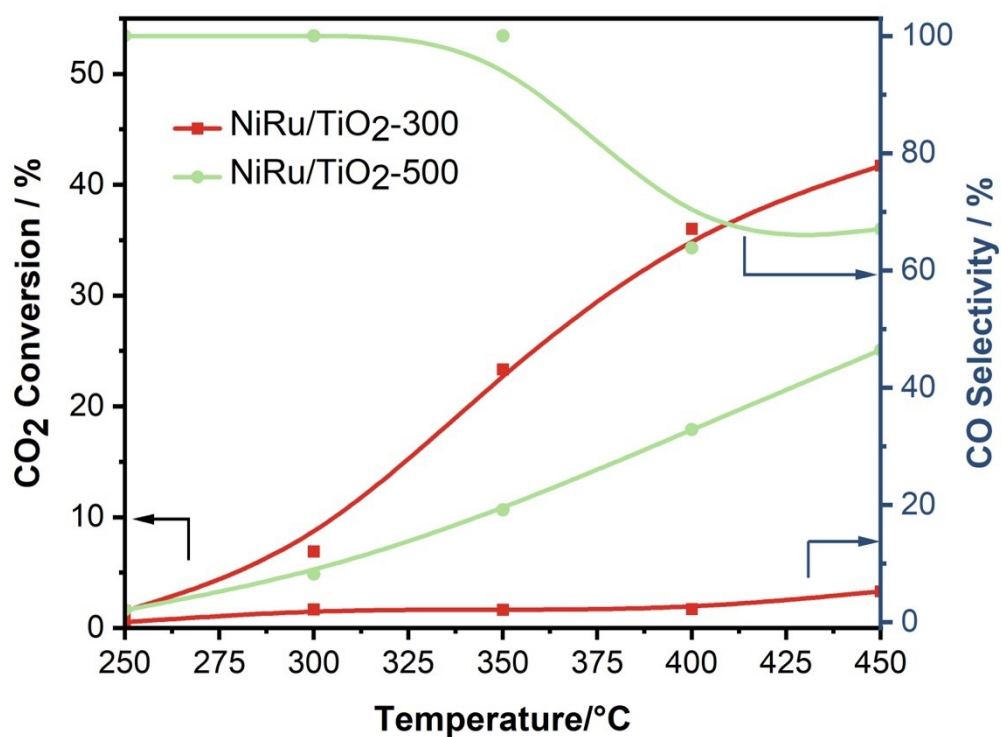

Figure. S3 CO<sub>2</sub> conversion and product selectivity of NiRu/TiO<sub>2</sub>-300 and NiRu/TiO<sub>2</sub>-500 catalysts. The reactant gas mixture (15% CO<sub>2</sub> : 60% H<sub>2</sub> : 25% N<sub>2</sub>) was fed into the reactor at a constant WHSV (Weigh Hourly Space Velocity) of 37800 mL•g<sup>-1</sup>•h<sup>-1</sup>.

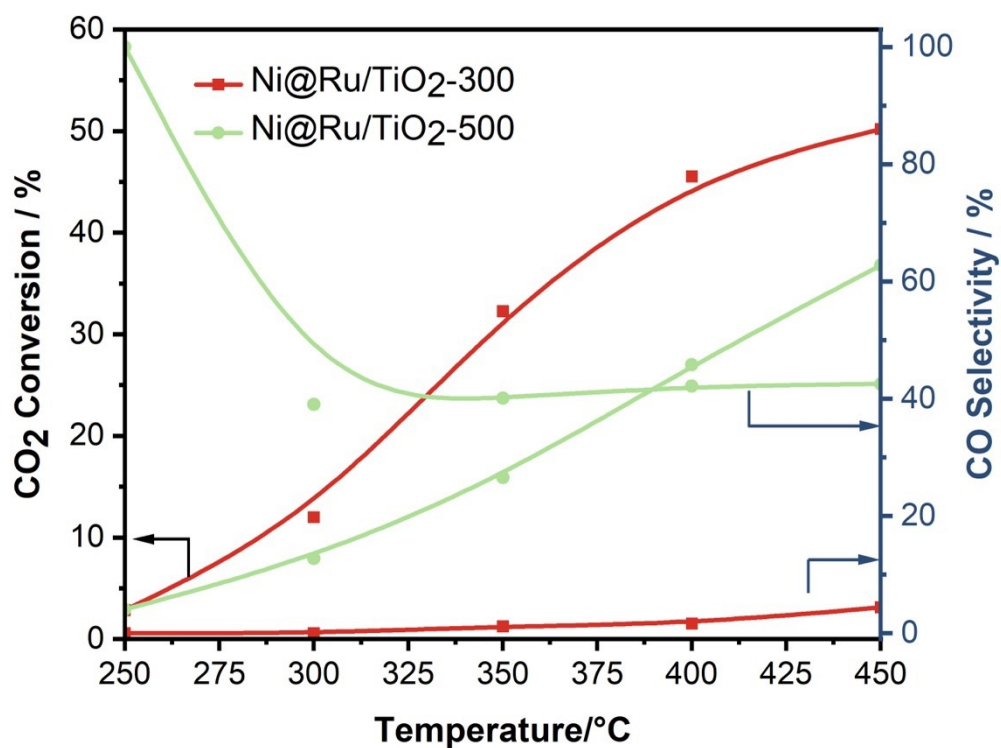

Figure. S4 CO<sub>2</sub> conversion and product selectivity of Ni@Ru/TiO<sub>2</sub>-300 and Ni@Ru/TiO<sub>2</sub>-500 catalysts. The reactant gas mixture (15% CO<sub>2</sub> : 60% H<sub>2</sub> : 25% N<sub>2</sub>) was fed into the reactor at a constant WHSV (Weigh Hourly Space Velocity) of 37800 mL•g<sup>-1</sup>•h<sup>-1</sup>.

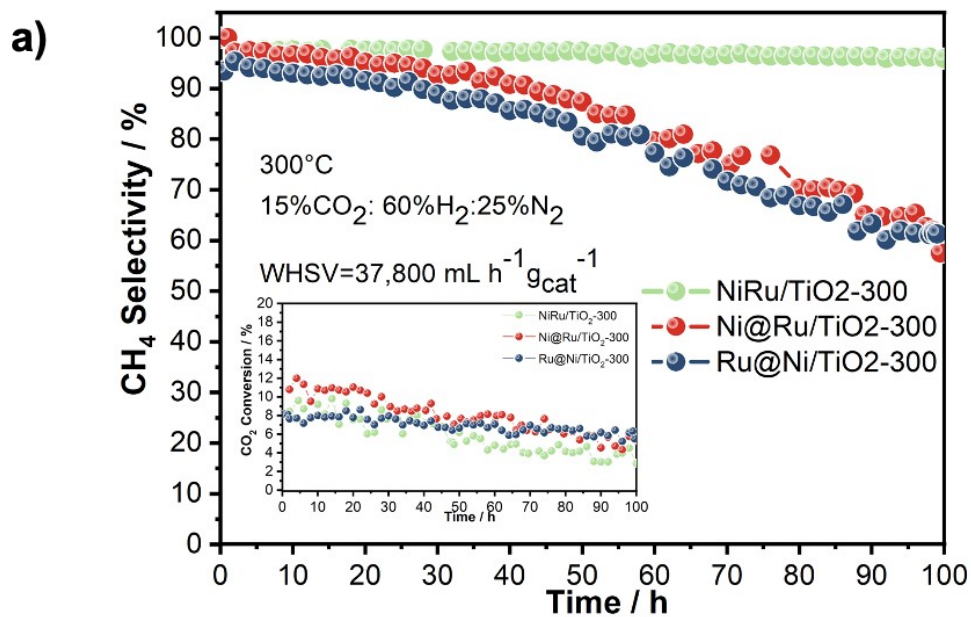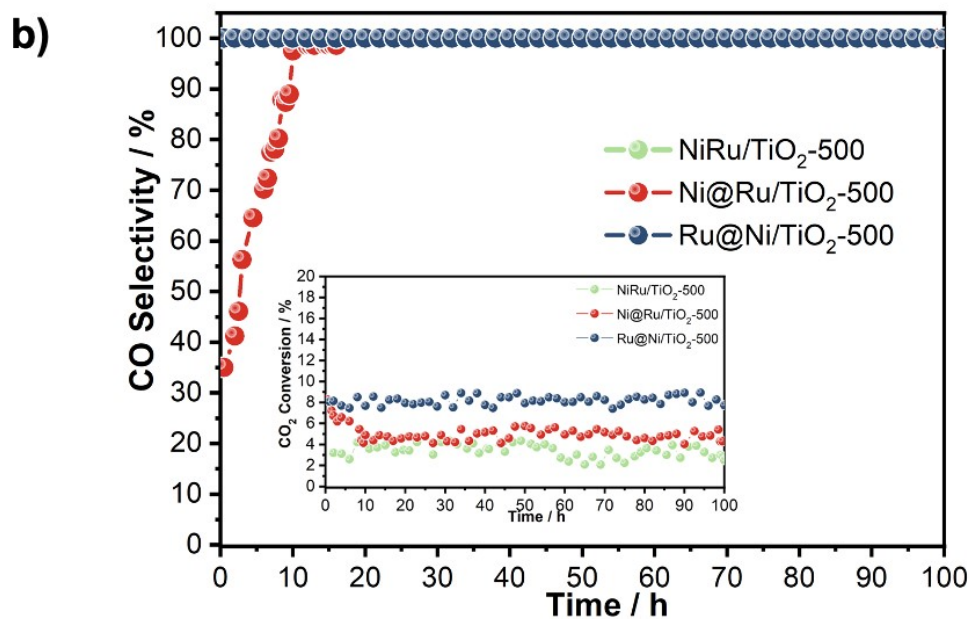

Figure. S5 (a) CH<sub>4</sub> selectivity and CO<sub>2</sub> conversion (left-bottom corner image) 100-h stability tests over catalysts reduction at 300 °C; (b) CO selectivity and CO<sub>2</sub> conversion (left-bottom corner image) 100-h stability tests over catalysts reduction at 500 °C.

## Spent catalysts-after 100h stability test

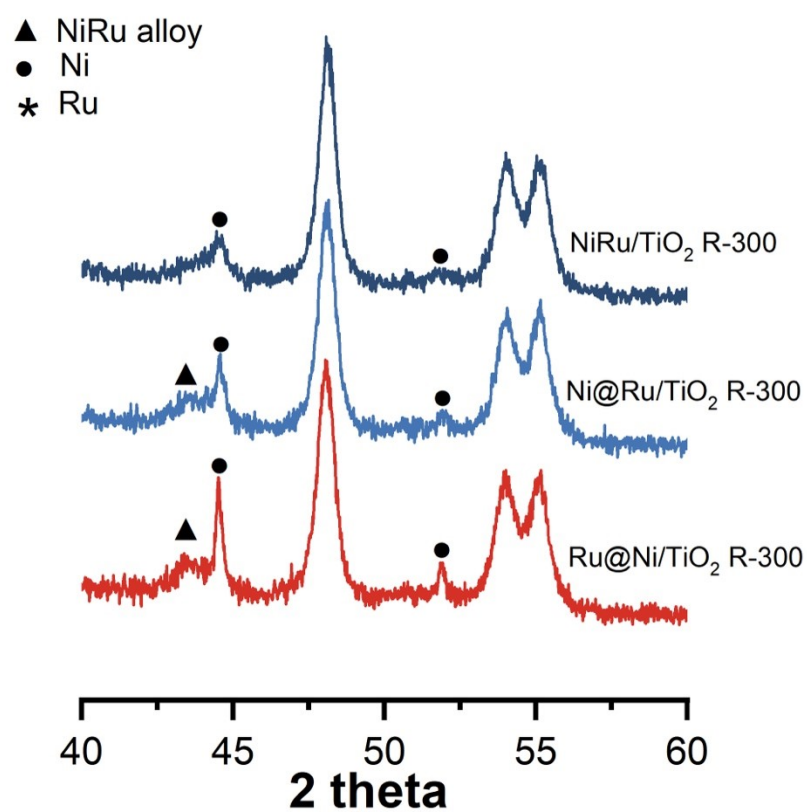

Figure. S6 The XRD results of catalysts (NiRu/TiO<sub>2</sub>-300, Ni@Ru/TiO<sub>2</sub>-300, and Ru@Ni/TiO<sub>2</sub>-300) after 100-h long-term stability tests.

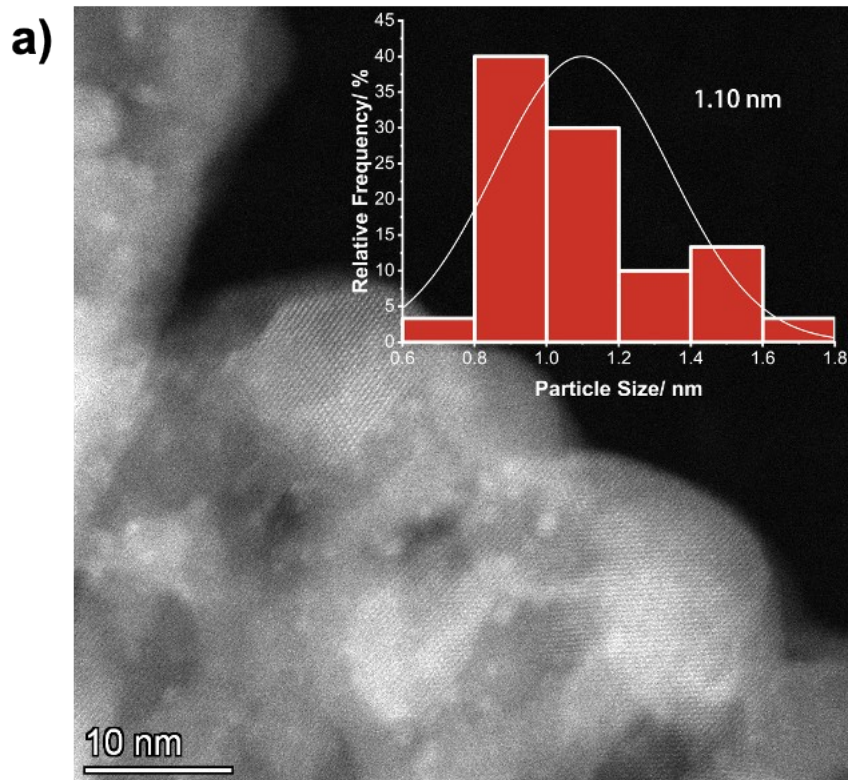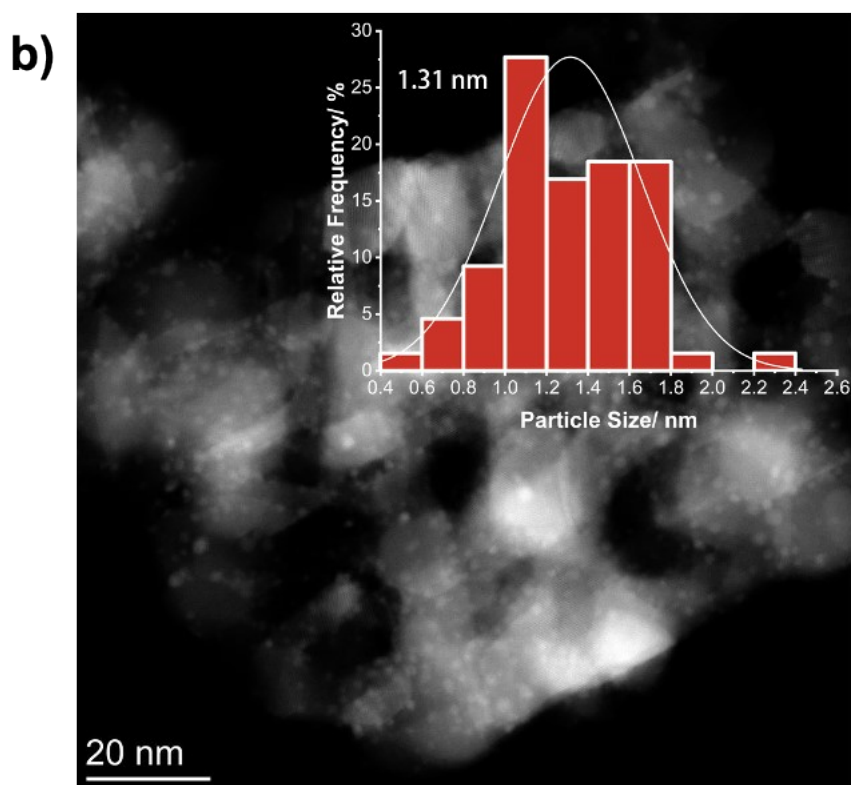

Figure. S7 STEM-HAADF: nanoparticle sizes of (a) NiRu/TiO<sub>2</sub>-300; (b) NiRu/TiO<sub>2</sub>-500.



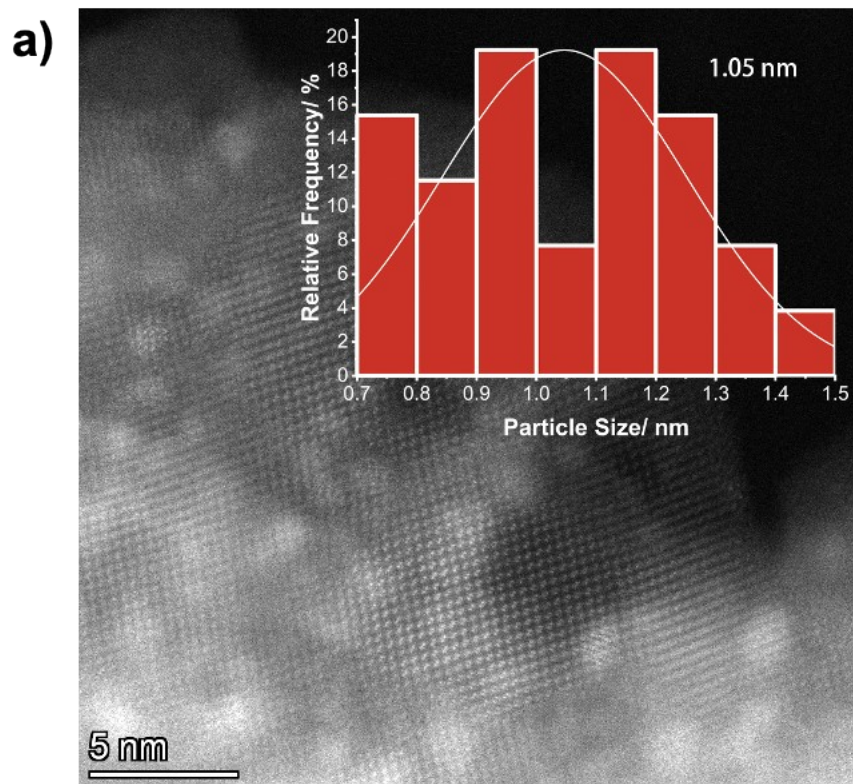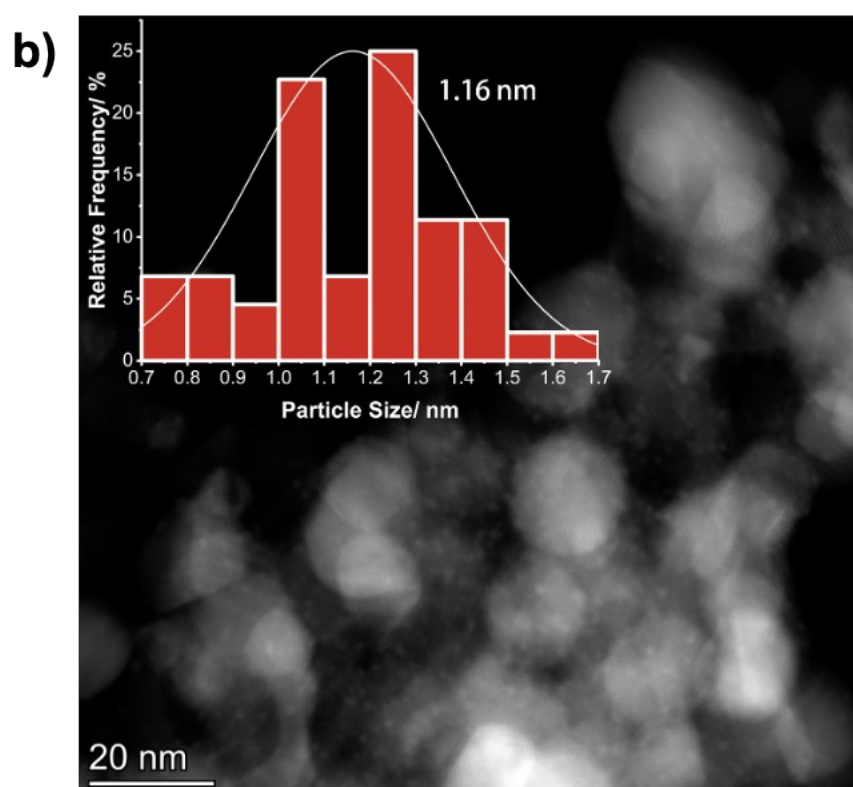

Figure. S8 STEM-HAADF: nanoparticle sizes of (a) Ni@Ru/TiO<sub>2</sub>-300; (b) Ni@Ru/TiO<sub>2</sub>-500.

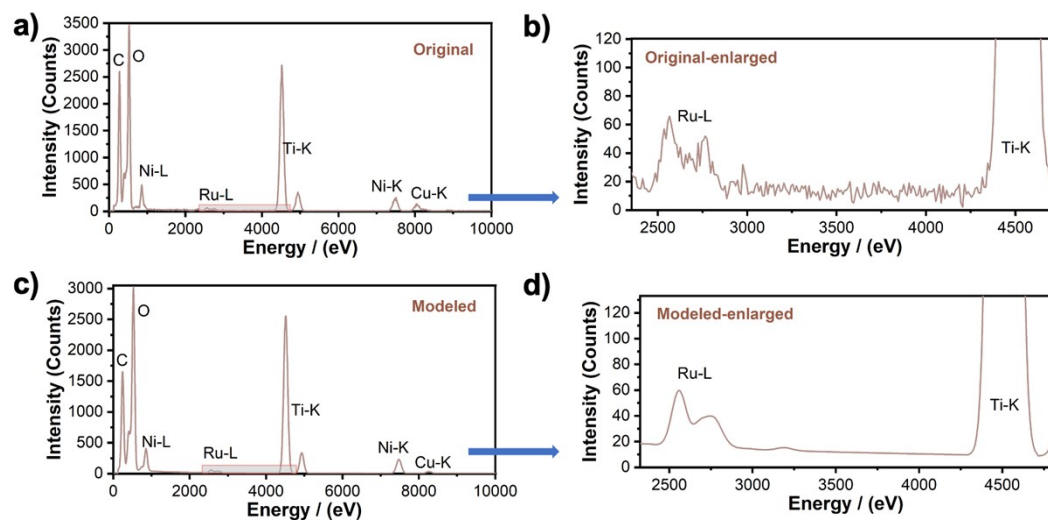

Figure S9. (a) The original and the enlarged Ru area spectra of the EDS in Fig. 2f; (b) the corresponding empirical modelled and the enlarged Ru area spectra of the EDS based on the Ni metal density Fig.2f.

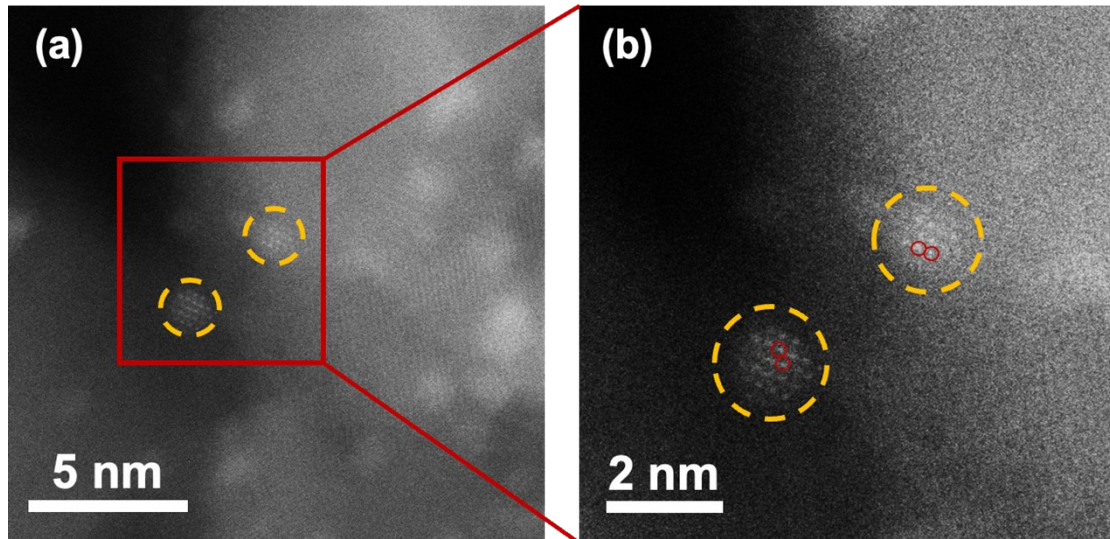

Figure. S10 (a) STEM-HAADF of NiRu alloy clusters highlighted in yellow circles and (b) the magnification STEM-HAADF region of the NiRu alloy clusters with distinguish Ru atoms in red circles.

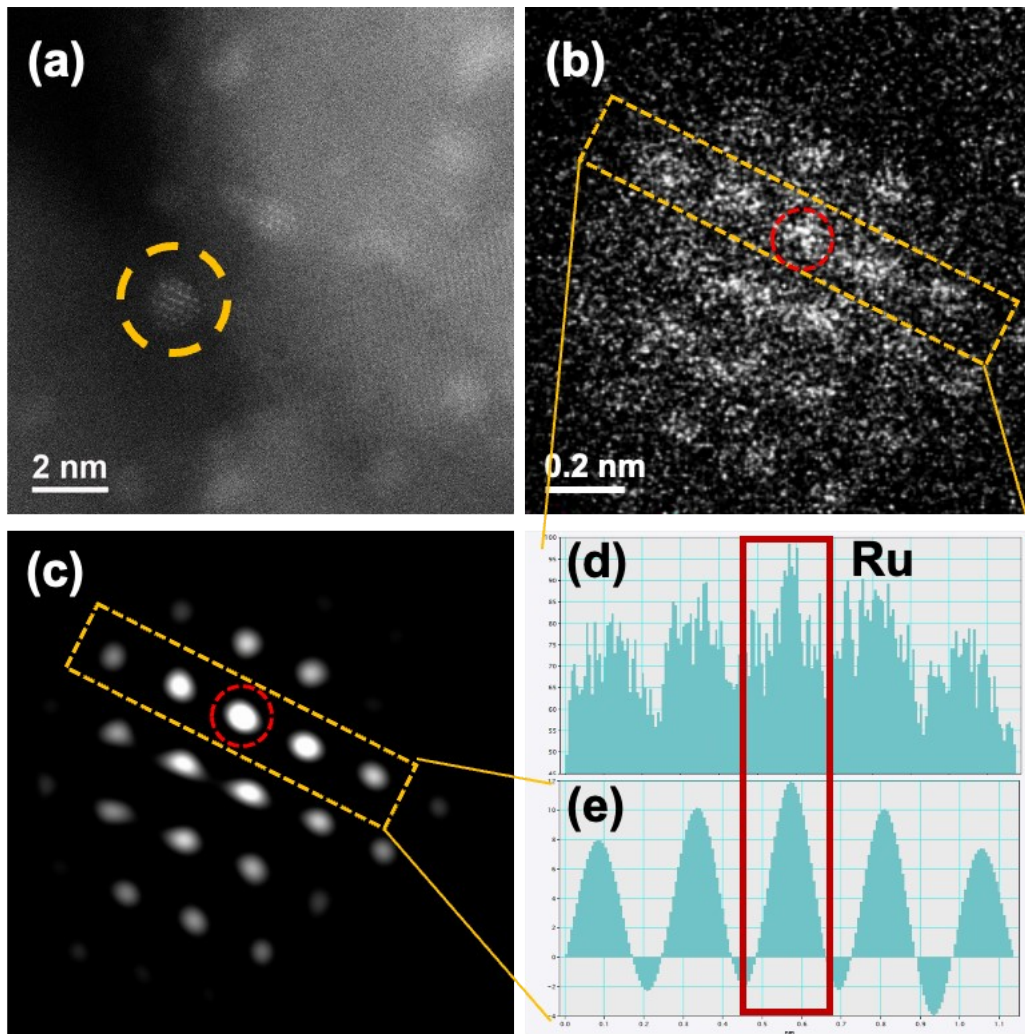

Figure. S11 (a) STEM-HAADF of Ru@Ni/TiO<sub>2</sub>-500 and (b) the corresponding enlarge image of yellow circle in (a): Ru single atoms in small Ni nano-clusters in red circle. (c) The filtered inverse Fast Fourier Transform (IFFT) image of (b). (d) The line intensity profile of a row of atoms in the yellow region of (b). (e) The corresponding line intensity profile of a row of atoms in the yellow region of (c).

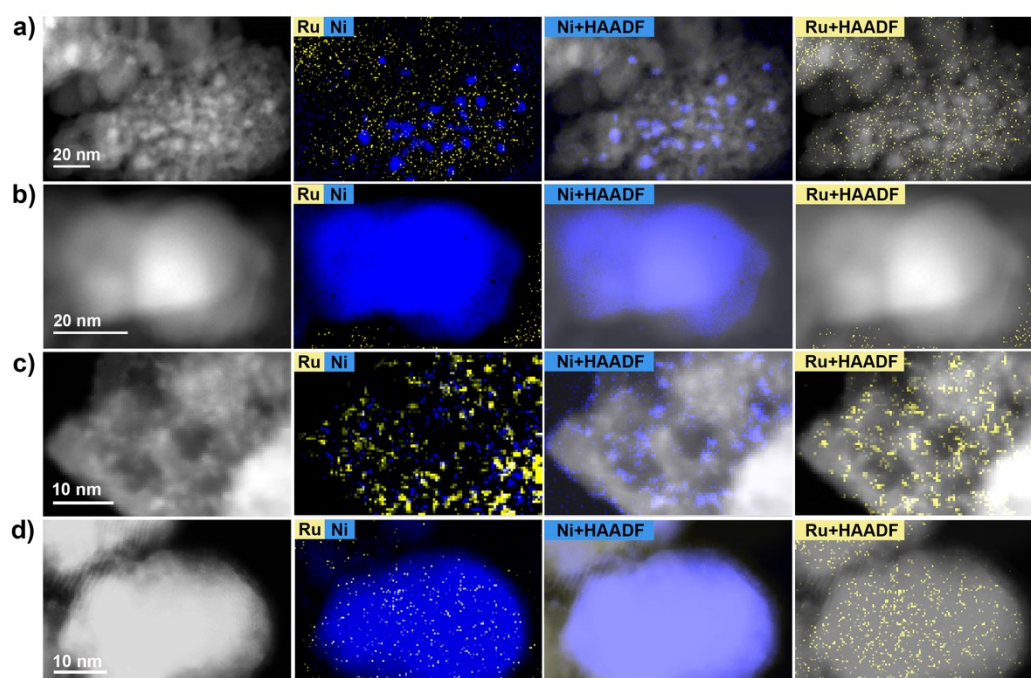

Figure S12. (a) STEM-HAADF of small nanoclusters in Ru@Ni/TiO<sub>2</sub>-300 and the corresponding Ni and Ru EELS mappings; (b) STEM-HAADF of large nanoclusters in Ru@Ni/TiO<sub>2</sub>-300 and the corresponding Ni and Ru EELS mappings; (c) STEM-HAADF of small nanoclusters in Ru@Ni/TiO<sub>2</sub>-500 and the corresponding Ni and Ru EELS mappings; (d) STEM-HAADF of large nanoclusters in Ru@Ni/TiO<sub>2</sub>-500 and the corresponding Ni and Ru EELS mappings.

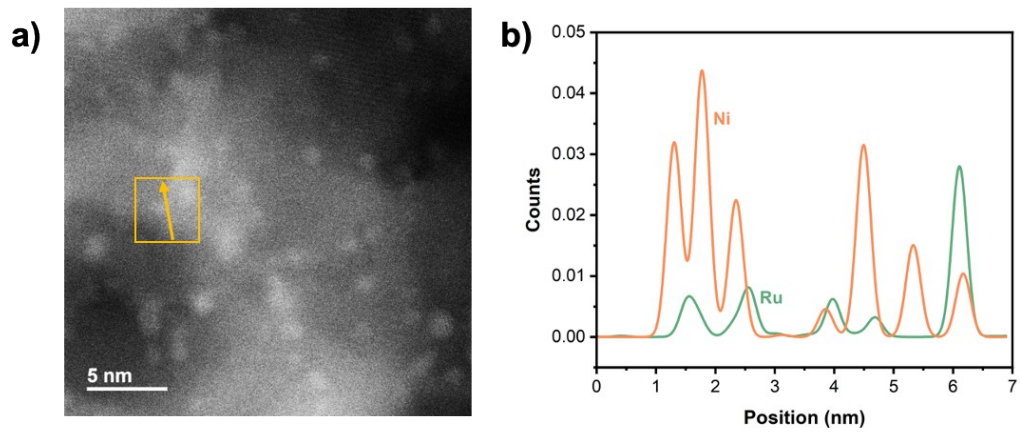

Figure. S13 (a) STEM-HAADF of Ru@Ni/TiO<sub>2</sub>-500; (b) the corresponding EDS line scanning in the area of the yellow box in the direction of the yellow arrow.

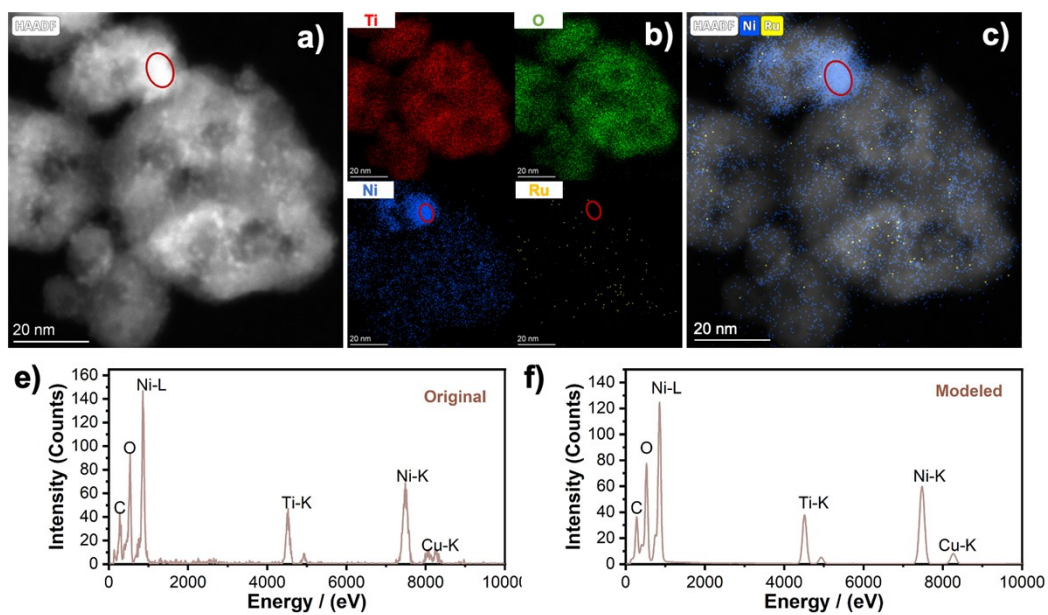

Figure. S14 (a) STEM-HAADF of NiRu/TiO<sub>2</sub>-300; (b) the corresponding EDS mapping; (c) a combined Ni and Ru EDS mapping; (e) the original spectrum of the EDS in the nanoparticle highlighted in a red circle; (f) the corresponding empirical modelled spectrum of the EDS based on the Ni metal density in the nanoparticle highlighted in a red circle.

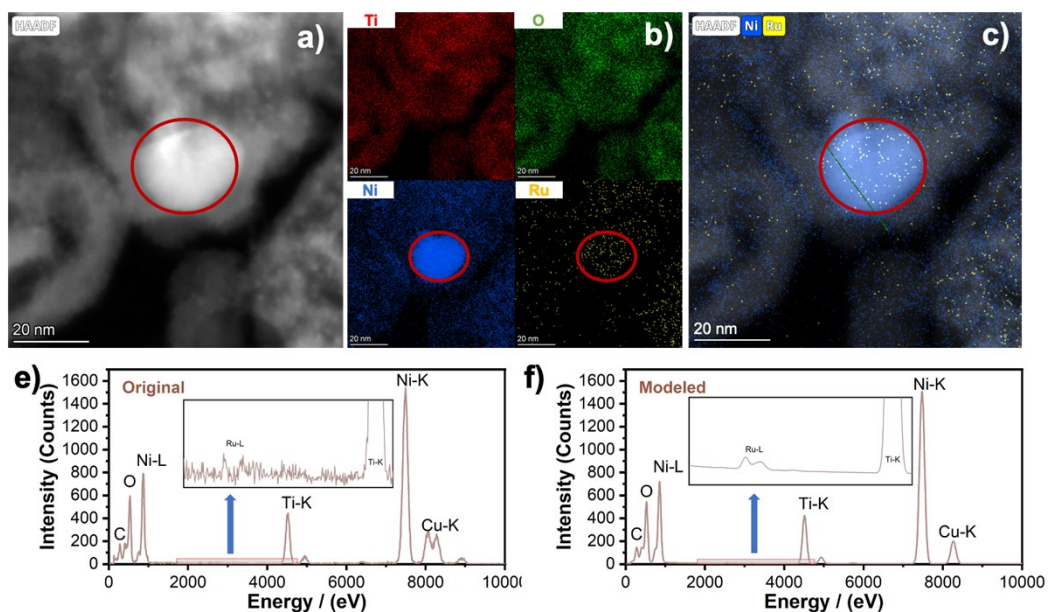

Figure. S15 (a) STEM-HAADF of NiRu/TiO<sub>2</sub>-500; (b) the corresponding EDS mapping; (c) a combined Ni and Ru EDS mapping; (e) the original spectrum of the EDS in the nanoparticle highlighted in a red circle and the corresponding enlarged area of Ru-L; (f) the corresponding empirical modelled spectrum of the EDS based on the Ni metal density in the nanoparticle highlighted in a red circle and the enlarged area of Ru-L.



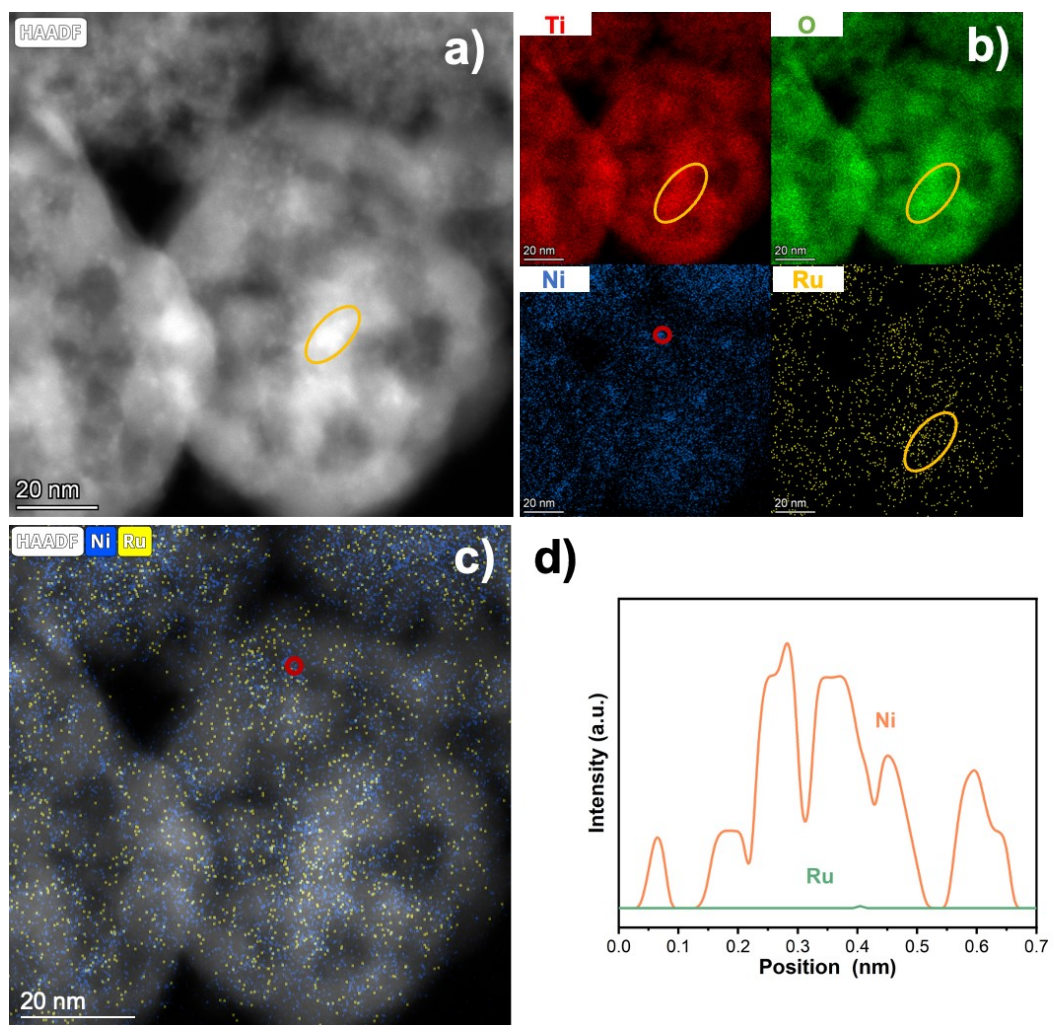

Figure. S16 (a) STEM-HAADF of Ni@Ru/TiO<sub>2</sub>-300; (b) the corresponding EDS mapping; (c) a combined Ni and Ru EDS mapping; (d) the EDS line scanning of Ni and Ru element distribution in the small nanoparticle highlighted in the red circle.

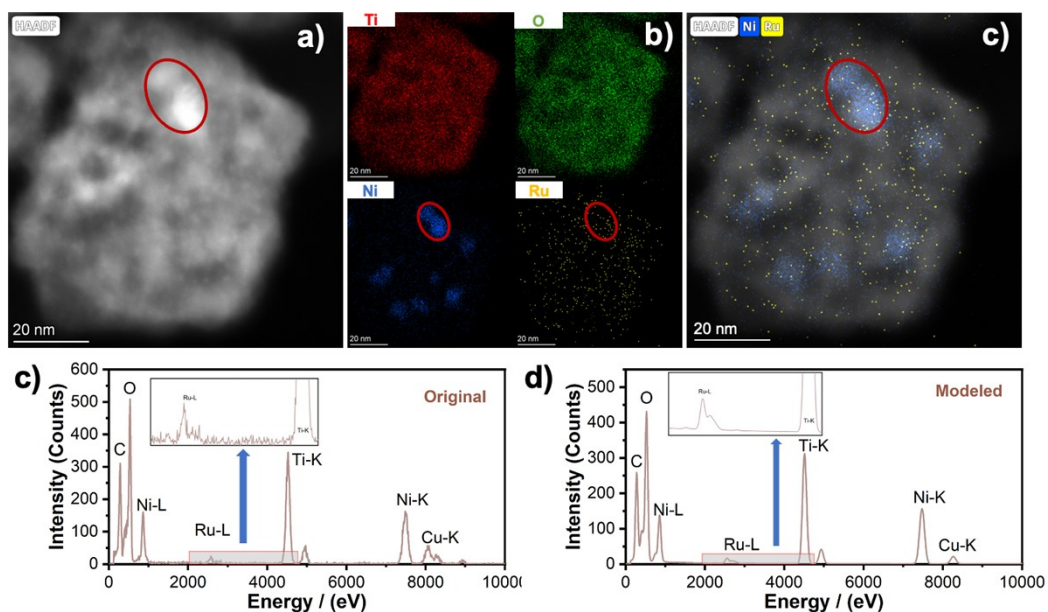

Figure. S17 (a) STEM-HAADF of Ni@Ru/TiO<sub>2</sub>-500; (b) the corresponding EDS mapping; (c) a combined Ni and Ru EDS mapping; (e) the original spectrum of the EDS in the nanoparticle highlighted in a red circle and the corresponding enlarged area of Ru-L; (f) the corresponding empirical modelled spectrum of the EDS based on the Ni metal density in the nanoparticle highlighted in a red circle and the enlarged area of Ru-L.

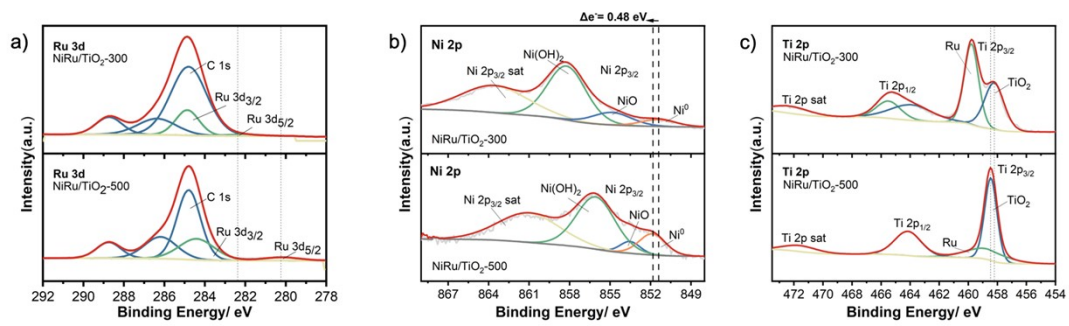

Figure. S18 (a) the C 1s and Ru 3d XPS results of NiRu/TiO<sub>2</sub>-300 and NiRu/TiO<sub>2</sub>-500; (b) the Ni 2p XPS results of NiRu/TiO<sub>2</sub>-300 and NiRu/TiO<sub>2</sub>-500; (c) the Ti 2p XPS results of NiRu/TiO<sub>2</sub>-300 and NiRu/TiO<sub>2</sub>-500.

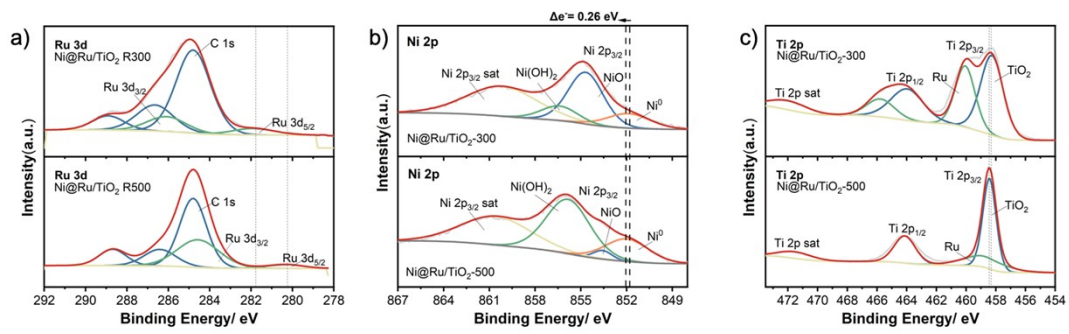

Figure. S19 (a) the C 1s and Ru 3d XPS results of Ni@Ru/TiO<sub>2</sub>-300 and Ni@Ru/TiO<sub>2</sub>-500; (b) the Ni 2p XPS results of Ni@Ru/TiO<sub>2</sub>-300 and Ni@Ru/TiO<sub>2</sub>-500; (c) the Ti 2p XPS results of Ni@Ru/TiO<sub>2</sub>-300 and Ni@Ru/TiO<sub>2</sub>-500.

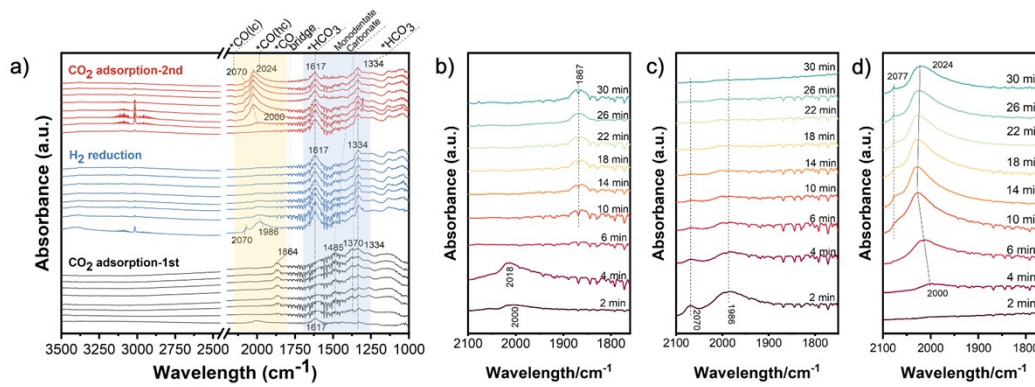

Figure. S20 The transition-state in-situ DRIFTS of Ru@Ni/TiO<sub>2</sub>-300 and the corresponding magnify area of \*CO in the procedure of: (b) CO<sub>2</sub> adsorption-1<sup>st</sup>; (c) H<sub>2</sub> reduction; (d) CO<sub>2</sub> adsorption-2<sup>nd</sup>.

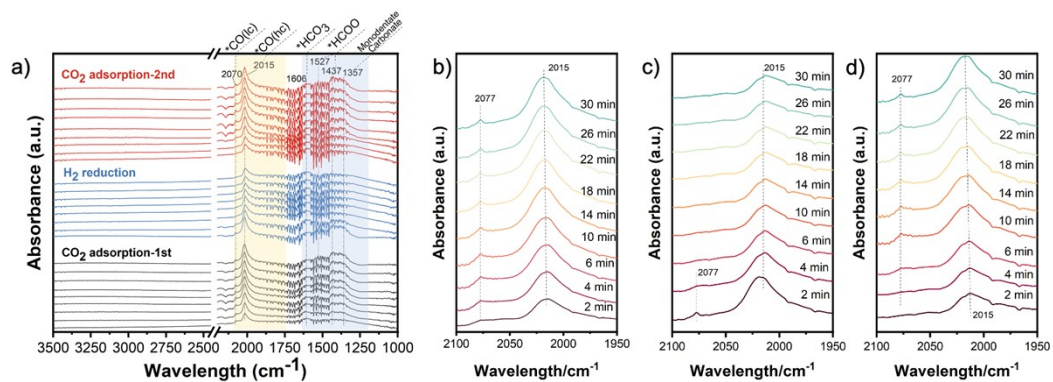

Figure. S21 The transition-state in-situ DRIFTS of Ru@Ni/TiO<sub>2</sub>-500 and the corresponding magnify area of \*CO in the procedure of: (b) CO<sub>2</sub> adsorption-1<sup>st</sup>; (c) H<sub>2</sub> reduction; (d) CO<sub>2</sub> adsorption-2<sup>nd</sup>.

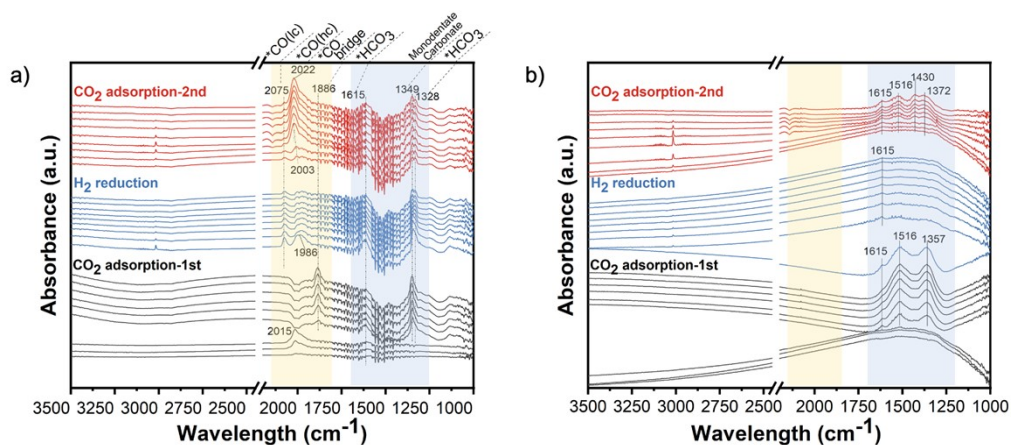

Figure. S22 The transition-state in-situ DRIFTS of (a) Ru/TiO<sub>2</sub> and (b) Ni/TiO<sub>2</sub>. Transition-state in-situ DRIFTS experiments are conducted by alternatively switching the adsorption gas three times to first 5% CO<sub>2</sub> in N<sub>2</sub>, then 20% H<sub>2</sub> in N<sub>2</sub>, and finally 5% CO<sub>2</sub> in N<sub>2</sub> again under the temperature at 300 °C

As reference, the transition-state experiments are also conducted on Ru/TiO<sub>2</sub> and Ni/TiO<sub>2</sub> (Fig. S22). It is revealed that only Ru atoms can directly dissociate CO<sub>2</sub> to \*CO species even without hydrogen. But both Ru and Ni atoms can dissociate H<sub>2</sub>. And the H<sub>2</sub> spillover phenomenon can be observed on Ni/TiO<sub>2</sub>.

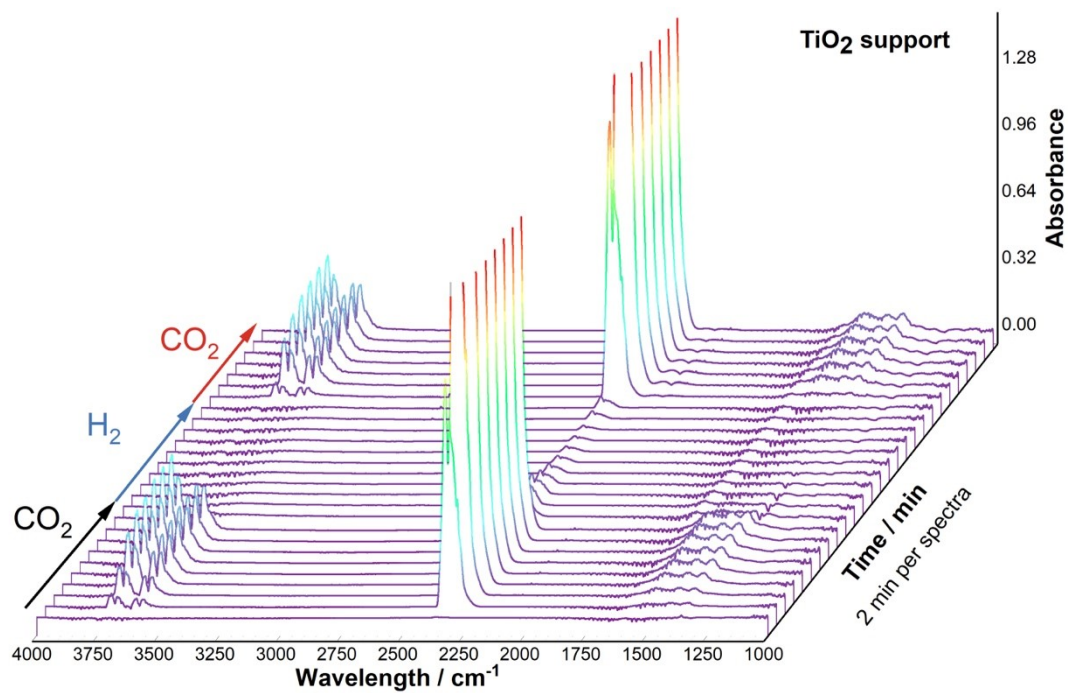

Figure. S23 3D graphs of the absorption intensity in transition-state in-situ DRIFTS experiments on pure anatase-TiO<sub>2</sub> support. Transition-state in-situ DRIFTS experiments are conducted by alternatively switching the adsorption gas three times to first 5%CO<sub>2</sub> in N<sub>2</sub>, then 20% H<sub>2</sub> in N<sub>2</sub>, and finally 5% CO<sub>2</sub> in N<sub>2</sub> again under the temperature at 300 °C



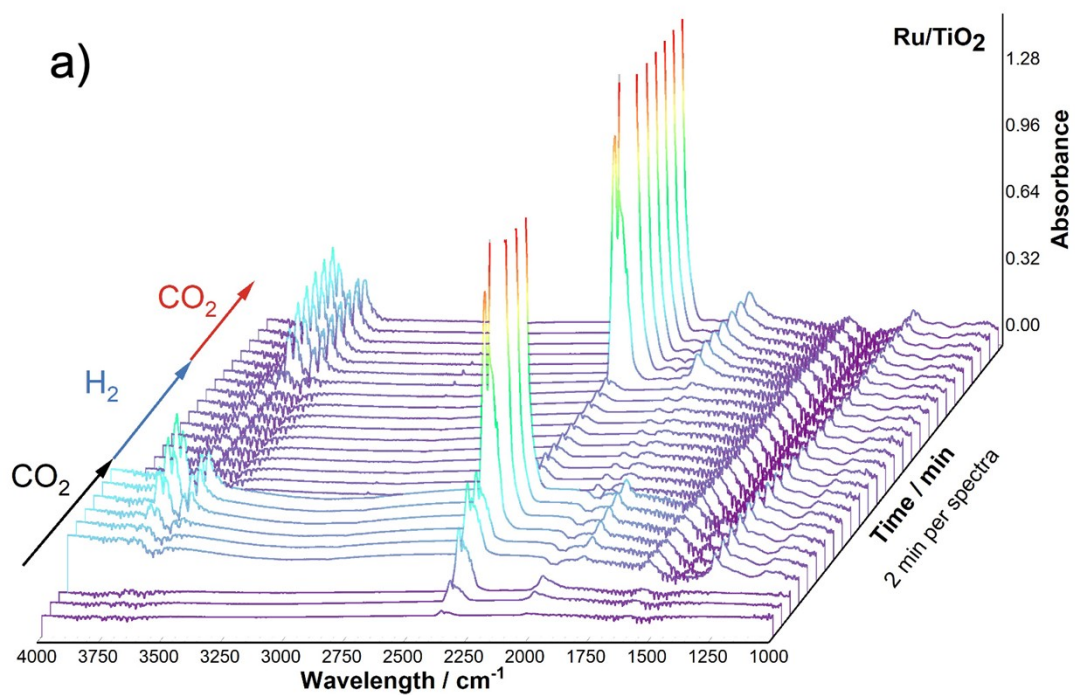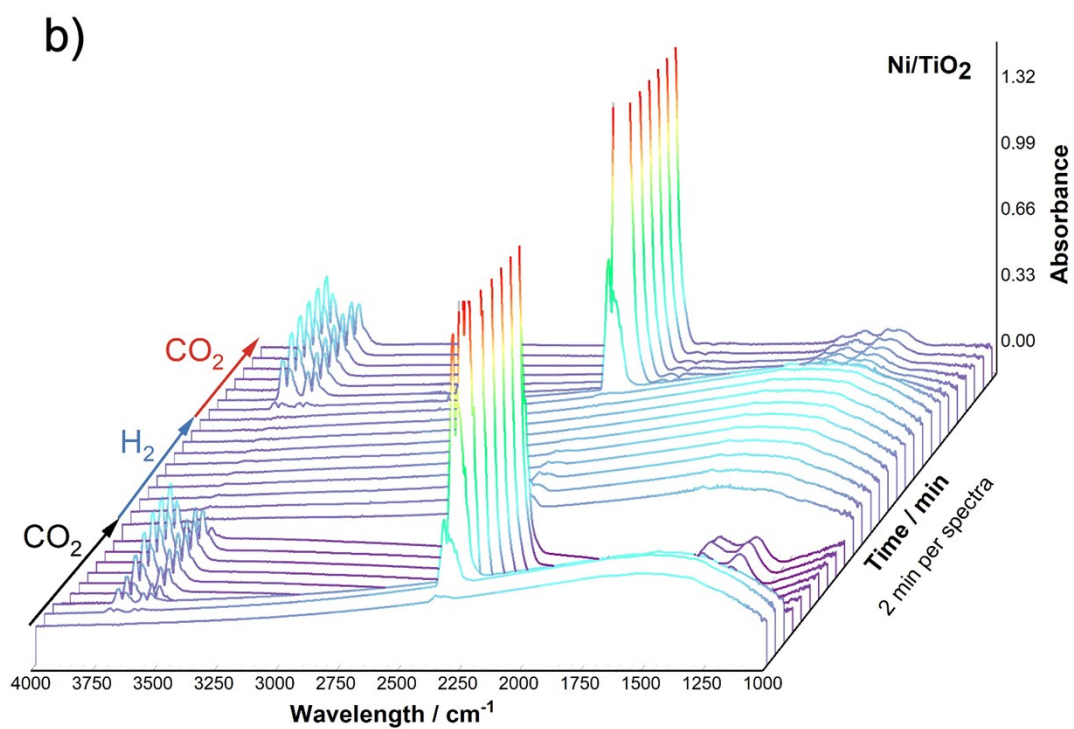

Figure. S24 3D graphs of the absorption intensity in transition-state in-situ DRIFTS experiments on (a) Ru/TiO<sub>2</sub> and (b) Ni/TiO<sub>2</sub>. Transition-state in-situ DRIFTS experiments are conducted by

alternatively switching the adsorption gas three times to first 5%CO<sub>2</sub> in N<sub>2</sub>, then 20% H<sub>2</sub> in N<sub>2</sub>, and finally 5% CO<sub>2</sub> in N<sub>2</sub> again under the temperature at 300 °C

Table S1. The Ni (111)  $2\theta$  angle, corresponding interplanar distance  $d_{(111)}$ , and lattice parameter  $a$  determined by XRD characterization

| Sample                      | $2\theta$ | $d_{(111)}$ -spacing | $a^*$ |
|-----------------------------|-----------|----------------------|-------|
| NiRu/TiO <sub>2</sub> -300  | 44.59     | 2.032                | 3.520 |
| NiRu/TiO <sub>2</sub> -500  | 44.48     | 2.036                | 3.522 |
| Ni@Ru/TiO <sub>2</sub> -300 | 44.56     | 2.033                | 3.521 |
| Ni@Ru/TiO <sub>2</sub> -500 | 44.48     | 2.036                | 3.522 |
| Ru@Ni/TiO <sub>2</sub> -300 | 44.53     | 2.035                | 3.521 |
| Ru@Ni/TiO <sub>2</sub> -500 | 44.48     | 2.036                | 3.522 |
| Ni (JCPDS 004-0850)         | 44.78     | 2.02                 | 3.494 |

\* As Ni and the Ni-Ru solid solution in our study have face-centred cubic crystalline structures [1], the lattice parameter  $a$  and interplanar distance  $d_{hkl}$  for the (hkl) planes meet the following relationship[2]:

$$d = \frac{a}{\sqrt{h^2 + k^2 + l^2}}$$

Where,  $d$  is the lattice distance,  $a$  is the lattice constant,  $hkl$  is the Miller index.

Table. S2 Infrared band assignments of the surface species for CO<sub>2</sub> adsorption and hydrogenation.

| Surface species                           | Frequency (cm <sup>-1</sup> ) |                                                              |                                                              |                                                   |                                                   |                                                | Ref.   |
|-------------------------------------------|-------------------------------|--------------------------------------------------------------|--------------------------------------------------------------|---------------------------------------------------|---------------------------------------------------|------------------------------------------------|--------|
|                                           | CO <sub>2</sub> hydrogenation | CO <sub>2</sub> adsorption on Ru@Ni/TiO <sub>2</sub><br>-300 | CO <sub>2</sub> adsorption on Ru@Ni/TiO <sub>2</sub><br>-500 | CO <sub>2</sub> adsorption on Ru/TiO <sub>2</sub> | CO <sub>2</sub> adsorption on Ni/TiO <sub>2</sub> | CO <sub>2</sub> adsorption on TiO <sub>2</sub> |        |
| monodentate carbonate (*CO <sub>3</sub> ) | 1439, 1366                    | 1485, 1370                                                   | 1357                                                         | 1349                                              | 1430, 1372                                        | 1366                                           | [3]    |
| bicarbonate (*HCO <sub>3</sub> )          | 1620                          | 1617, 1334                                                   | 1606                                                         | 1615, 1328                                        | 1615, 1357                                        | 1615                                           | [4, 5] |
| formate (*COOH)                           | 1550, 1437, 2961, 2876        | -                                                            | 1527, 1437                                                   | 1585, 1481                                        | 1516                                              | 1530, 1432                                     | [6]    |
| linear *CO (hc)                           | 2020-2010                     | 1986, 2000-2024                                              | 2015                                                         | 1986, 2003-2022                                   | -                                                 | -                                              | [7]    |
| bridge *CO                                | -                             | 1864                                                         | -                                                            | 1886                                              | -                                                 | -                                              | [6]    |
| geminal *CO (lc)                          | 2070                          | 2070                                                         |                                                              | 2075                                              | -                                                 | -                                              | [8]    |
| CH <sub>4</sub> (g)                       | 3017, 1300                    | 3017, 1300                                                   | -                                                            | 3017, 1300                                        | 3017, 1300                                        | 3017, 1300                                     | [9]    |
| CO (g)                                    | 2174, 2117                    | 2174, 2117                                                   | 2147, 2117                                                   | 2147, 2117                                        | 2147, 2117                                        | 2147, 2117                                     | [10]   |

Table S3. Ni<sup>0</sup> proportion calculation results of catalysts<sup>a</sup>.

| Catalysts                   | Ni species          | Peak area | P(Ni <sup>0</sup> ) <sup>b</sup> |
|-----------------------------|---------------------|-----------|----------------------------------|
| NiRu/TiO <sub>2</sub> -500  | Ni <sup>0</sup>     | 2270.93   | 20.5%                            |
|                             | NiO                 | 857.46    |                                  |
|                             | Ni(OH) <sub>2</sub> | 7471.46   |                                  |
| Ni@Ru/TiO <sub>2</sub> -500 | Ni <sup>0</sup>     | 6294.94   | 27.9%                            |
|                             | NiO                 | 1006.73   |                                  |
|                             | Ni(OH) <sub>2</sub> | 15195.08  |                                  |
| Ru@Ni/TiO <sub>2</sub> -500 | Ni <sup>0</sup>     | 3700.49   | 23.5%                            |
|                             | NiO                 | 1180.61   |                                  |
|                             | Ni(OH) <sub>2</sub> | 10858.92  |                                  |

<sup>a</sup> Determined from XPS measurements.

<sup>b</sup> Proportion of Ni<sup>0</sup>=Area(Ni<sup>0</sup>)/[Area(Ni<sup>0</sup>)+ Area(NiO)+ Area(Ni(OH)<sub>2</sub>)] × 100%[11].

Table S4. Surface metal concentration ratios determined by XPS results[12, 13].

| <b>Sample</b>          | <b>Ru/Ti ratio*</b> | <b>Ru/Ni ratio*</b> | <b>Ni/Ti ratio*</b> |
|------------------------|---------------------|---------------------|---------------------|
| NiRu/TiO <sub>2</sub>  | 0.019               | 0.776               | 0.024               |
| Ni@Ru/TiO <sub>2</sub> | 0.035               | 0.689               | 0.051               |
| Ru@Ni/TiO <sub>2</sub> | 0.018               | 0.178               | 0.101               |

\* For two elements i, j in the sample, the concentration of i and j can be calculated by the following equation:

$$\frac{n_i}{n_j} = \frac{I_i/S_i}{I_j/S_j}$$

Where,  $n_i/n_j$  is the surface concentration percent of elements i and j;  $I_i$  and  $I_j$  are the corresponding peak intensity (peak area here) of elements i and j;  $S_i$  and  $S_j$  are the corresponding sensitivity index of elements i and j in the XPS handbook ( $S_{Ni,2p}$  (peak area) = 4.044,  $S_{Ru,2p}$  (peak area) = 4.273).



## References

- [1] O.U. Valdés-Martínez, C.E. Santolalla-Vargas, V. Santes, J.A. de los Reyes, B. Pawelec, J.L.G. Fierro, Influence of calcination on metallic dispersion and support interactions for NiRu/TiO<sub>2</sub> catalyst in the hydrodeoxygenation of phenol, *Catalysis Today*, 329 (2019) 149-155.
- [2] B.D. Cullity, *Elements of X-ray Diffraction*, Addison-Wesley Publishing 1956.
- [3] A. Cárdenas-Arenas, A. Quindimil, A. Davó-Quiñonero, E. Bailón-García, D. Lozano-Castelló, U. De-La-Torre, B. Pereda-Ayo, J.A. González-Marcos, J.R. González-Velasco, A. Bueno-López, Isotopic and in situ DRIFTS study of the CO<sub>2</sub> methanation mechanism using Ni/CeO<sub>2</sub> and Ni/Al<sub>2</sub>O<sub>3</sub> catalysts, *Applied Catalysis B: Environmental*, 265 (2020) 118538.
- [4] L. Proaño, E. Tello, M.A. Arellano-Trevino, S. Wang, R.J. Farrauto, M. Cobo, In-situ DRIFTS study of two-step CO<sub>2</sub> capture and catalytic methanation over Ru, "Na<sub>2</sub>O"/Al<sub>2</sub>O<sub>3</sub> Dual Functional Material, *Applied Surface Science*, 479 (2019) 25-30.
- [5] F. Wang, S. He, H. Chen, B. Wang, L. Zheng, M. Wei, D.G. Evans, X. Duan, Active Site Dependent Reaction Mechanism over Ru/CeO<sub>2</sub> Catalyst toward CO<sub>2</sub> Methanation, *Journal of the American Chemical Society*, 138 (2016) 6298-6305.
- [6] X. Xu, L. Liu, Y. Tong, X. Fang, J. Xu, D.-e. Jiang, X. Wang, Facile Cr<sup>3+</sup>-Doping Strategy Dramatically Promoting Ru/CeO<sub>2</sub> for Low-Temperature CO<sub>2</sub> Methanation: Unraveling the Roles of Surface Oxygen Vacancies and Hydroxyl Groups, *ACS Catalysis*, 11 (2021) 5762-5775.
- [7] S. Chen, A.M. Abdel-Mageed, M. Dybala, M. Parlinska-Wojtan, J. Bansmann, S. Pollastri, L. Olivi, G. Aquilanti, R.J. Behm, Raising the CO<sub>x</sub> Methanation Activity of a Ru/γ-Al<sub>2</sub>O<sub>3</sub> Catalyst by Activated Modification of Metal-Support Interactions, *Angewandte Chemie International Edition*, 59 (2020) 22763-22770.
- [8] J.C. Matsubu, V.N. Yang, P. Christopher, Isolated Metal Active Site Concentration and Stability Control Catalytic CO<sub>2</sub> Reduction Selectivity, *Journal of the American Chemical Society*, 137 (2015) 3076-3084.
- [9] J. Zhou, Z. Gao, G. Xiang, T. Zhai, Z. Liu, W. Zhao, X. Liang, L. Wang, Interfacial compatibility critically controls Ru/TiO<sub>2</sub> metal-support interaction modes in CO<sub>2</sub> hydrogenation, *Nature Communications*, 13 (2022) 327.
- [10] X. Li, J. Lin, L. Li, Y. Huang, X. Pan, S.E. Collins, Y. Ren, Y. Su, L. Kang, X. Liu, Y. Zhou, H. Wang, A. Wang, B. Qiao, X. Wang, T. Zhang, Controlling CO<sub>2</sub> Hydrogenation Selectivity by Metal-Supported Electron Transfer, *Angewandte Chemie International Edition*, 59 (2020) 19983-19989.
- [11] S. Zou, M. Zhang, S. Mo, H. Cheng, M. Fu, P. Chen, L. Chen, W. Shi, D. Ye, Catalytic Performance of Toluene Combustion over Pt Nanoparticles Supported on Pore-Modified Macro-Meso-Microporous Zeolite Foam, *Nanomaterials*, 2020.
- [12] J. Zhou, L. Guo, X. Guo, J. Mao, S. Zhang, Selective hydrogenolysis of glycerol to propanediols on supported Cu-containing bimetallic catalysts, *Green Chemistry*, 12 (2010) 1835-1843.
- [13] P. Yan, E. Kennedy, M. Stockenhuber, Hydrodeoxygenation of guaiacol over BEA supported bimetallic Ni-Fe catalysts with varied impregnation sequence, *Journal of Catalysis*, 404 (2021) 1-11.
